# Supplementary material
Source: PubMed Central journal article supplement (PMC5970994)

## **Supplementary Information**

### **Cellular Milieu Imparts Distinct Pathological $\alpha$ -Synuclein Stains in $\alpha$ -Synucleinopathies**

Chao Peng, Ronald J. Gathagan, Dustin J. Covell, Coraima Medellin, Anna Stieber, John L. Robinson, Bin Zhang, Rose M. Pitkin, Modupe F. Olufemi, Kelvin C. Luk, John Q. Trojanowski, Virginia M.-Y. Lee\*

Table of contents:

- **Supplementary Table 1.** Clinical Information.
- **Supplementary Table 2.** Biochemical Information for Sarkosyl Insoluble Fractions of Brain Extractions.
- **Supplementary Table 3.** Quantification of  $\alpha$ -Syn in the Sarkosyl Insoluble Fraction of Neuronal Culture Extractions.
- **Supplementary Table 4.** Antibodies Used in This Study.
- **Supplementary Table 5.** Statistics.
- **Supplementary Reference**
- **Supplementary Fig. 1.** Full blots of western blot data

**Supplementary Table 1 Clinical Information.**

**Clinical Information of the Cases Used for the Extraction of Pathological  $\alpha$ -Syn**

| <b>Case No.</b> | <b>Clinical Diagnosis</b> | <b>Pathological Diagnosis</b> | <b>Race</b>  | <b>Sex</b> | <b>Age of Disease onset</b> | <b>Age at Death</b> | <b>PMI (h)</b> | <b>Brain Region used</b>          |
|-----------------|---------------------------|-------------------------------|--------------|------------|-----------------------------|---------------------|----------------|-----------------------------------|
| 1               | MSA-P                     | MSA                           | Multi-racial | Female     | 63                          | 67                  | 11             | Cerebellum / Cingulate Gyrus      |
| 2               | MSA-P                     | MSA                           | White        | Male       | 73                          | 77                  | 5              | Cerebellum                        |
| 3               | MSA-P                     | MSA                           | Asian        | Female     | 47                          | 56                  | 6              | Cerebellum / Middle Frontal Gyrus |
| 4               | MSA-P                     | MSA                           | White        | Male       | 61                          | 72                  | 4.5            | Middle Frontal Gyrus              |
| 5               | MSA-C                     | MSA                           | White        | Female     | 55                          | 64                  | 16             | Middle Frontal Gyrus              |
| 6               | MSA-C                     | MSA                           | Multi-racial | Male       | 55                          | 62                  | 24             | Middle Frontal Gyrus              |
| 7               | AD Probable               | AD                            | White        | Female     | 52                          | 62                  | 11             | Middle Frontal Gyrus              |
| 8               | CBS                       | AD                            | White        | Female     | 45                          | 55                  | 15             | Middle Frontal Gyrus              |
| 9               | DLB                       | DLB                           | White        | Male       | 76                          | 83                  | 6              | Cingulate Gyrus                   |
| 10              | PDD                       | PDD                           | White        | Male       | 54                          | 75                  | 6.5            | Cingulate Gyrus                   |
| 11              | PDD                       | PDD                           | White        | Female     | 51                          | 66                  | 12             | Middle Frontal Gyrus              |
| 12              | PDD                       | PDD                           | White        | Male       | 49                          | 70                  | 12.5           | Cingulate Gyrus                   |
| 13              | PDD                       | PDD                           | White        | Male       | 71                          | 74                  | 12             | Cingulate Gyrus                   |
| 14              | DLB                       | PDD                           | White        | Male       | 66                          | 72                  | 9              | Cingulate Gyrus                   |
| 15              | PDD                       | PDD                           | White        | Male       | 60                          | 72                  | 19             | Cingulate Gyrus                   |
| 16              | Normal                    | Normal                        | White        | Male       | -                           | 59                  | 18             | Middle Frontal Gyrus              |
| 30              | Normal                    | Normal                        | White        | Male       | -                           | 70                  | 10.5           | Middle Frontal Gyrus              |
| 31              | Normal                    | Normal                        | Black        | Male       | -                           | 66                  | 20             | Cingulate Gyrus                   |
| 32              | Normal                    | Normal                        | White        | Male       | -                           | 61                  | 15             | Cingulate Gyrus                   |
| 33              | Normal                    | Normal                        | Black        | Female     | -                           | 72                  | 6              | Middle Frontal Gyrus              |

**Supplementary Table 1 (Continue)**

**Clinical Information of the Cases Used for IHC Shown in Fig. 1e&f and extended data Fig. 2**

| <b>Case No.</b> | <b>Clinical Diagnosis</b> | <b>Pathological Diagnosis</b> | <b>Race</b>  | <b>Sex</b> | <b>Age of Disease onset</b> | <b>Age at Death</b> | <b>PMI (h)</b> | <b>Brain Region used</b> |
|-----------------|---------------------------|-------------------------------|--------------|------------|-----------------------------|---------------------|----------------|--------------------------|
| 3               | MSA-P                     | MSA                           | Asian        | Female     | 47                          | 56                  | 6              | Middle Frontal Gyrus     |
| 6               | MSA-C                     | MSA                           | Multi-racial | Male       | 55                          | 62                  | 24             | Middle Frontal Gyrus     |
| 7               | AD Probable               | AD                            | White        | Female     | 52                          | 62                  | 11             | Hippocampus              |
| 12              | PDD                       | PDD                           | White        | Male       | 49                          | 70                  | 12.5           | Middle Frontal Gyrus     |
| 17              | AD Probable               | AD                            | White        | Male       | 66                          | 71                  | 7              | Substantia Nigra         |
| 18              | AD Probable               | AD                            | White        | Male       | 62                          | 79                  | 8              | Middle Frontal Gyrus     |
| 19              | DLB                       | DLB                           | White        | Male       | 67                          | 76                  | 8              | Substantia Nigra         |
| 20              | CBS                       | DLB                           | White        | Male       | 78                          | 83                  | 20             | Middle Frontal Gyrus     |
| 21              | DLB                       | DLB                           | White        | Male       | 60                          | 68                  | 12             | Hippocampus              |
| 22              | PD (not demented)         | PD                            | White        | Male       | 70                          | 81                  | 7              | Substantia Nigra         |
| 23              | PDD                       | PDD                           | White        | Male       | 52                          | 68                  | 7              | Hippocampus              |
| 24              | MSA-C                     | MSA                           | Black        | Male       | 61                          | 65                  | 43             | Cerebellum               |
| 25              | MSA-C                     | MSA                           | White        | Female     | 53                          | 67                  | 19             | Substantia Nigra         |
| 26              | MSA-C                     | MSA                           | White        | Male       | 54                          | 63                  | 24             | Hippocampus              |
| 27              | PD (not demented)         | MSA                           | White        | Male       | 45                          | 54                  | 15             | Hippocampus              |
| 28              | MSA-P                     | MSA                           | White        | Female     | 67                          | 76                  | 2              | Substantia Nigra         |
| 29              | MSA-P                     | MSA                           | White        | Female     | 50                          | 57                  | 8              | Substantia Nigra         |

**Supplementary Table 1 (Continued)**

**Clinical Information of the Cases Used for IHC and Quantification Shown in Fig. 3d&e**

| <b>Case No.</b> | <b>Clinical Diagnosis</b> | <b>Pathological Diagnosis</b> | <b>Race</b> | <b>Sex</b> | <b>Age of Disease onset</b> | <b>Age at Death</b> | <b>PMI (h)</b> | <b>Brain Region used</b> |
|-----------------|---------------------------|-------------------------------|-------------|------------|-----------------------------|---------------------|----------------|--------------------------|
| 26              | MSA-C                     | MSA                           | White       | Male       | 54                          | 63                  | 24             | Medulla                  |
| 27              | PD (not demented)         | MSA                           | White       | Male       | 45                          | 54                  | 15             | Medulla                  |
| 29              | MSA-P                     | MSA                           | White       | Female     | 50                          | 57                  | 8              | Medulla                  |
| 34              | MSA-P                     | MSA                           | White       | Male       | 74                          | 79                  | 16             | Medulla                  |
| 35              | PD (not demented)         | MSA                           | White       | Female     | 57                          | 72                  | 14             | Hippocampus              |
| 36              | MSA-P                     | MSA                           | White       | Male       | 59                          | 73                  | 8              | Hippocampus              |

**Clinical Information of the Cases Used for IHC Shown in Extended Data Fig. 9d**

| <b>Case No.</b> | <b>Clinical Diagnosis</b> | <b>Pathological Diagnosis</b> | <b>Race</b>  | <b>Sex</b> | <b>Age of Disease onset</b> | <b>Age at Death</b> | <b>PMI (h)</b> | <b>Brain Region used</b> |
|-----------------|---------------------------|-------------------------------|--------------|------------|-----------------------------|---------------------|----------------|--------------------------|
| 6               | MSA-C                     | MSA                           | Multi-racial | Male       | 55                          | 62                  | 24             | Middle Frontal Gyrus     |
| 25              | MSA-C                     | MSA                           | White        | Female     | 53                          | 67                  | 19             | Substantia Nigra         |

**PMI: postmortem interval**

**Supplementary Table 2 Biochemical Information for Sarkosyl Insoluble Fractions of Brain Extractions.**

| Case No. | Brain Region         | Diagnosis | $\alpha$ -Syn (ug/ml) | Tau (ug/ml) | Abeta 40 (ng/ml) | Abeta 42 (ng/ml) | Total protein (mg/ml) |
|----------|----------------------|-----------|-----------------------|-------------|------------------|------------------|-----------------------|
| 1        | Cerebellum           | MSA-P     | 22.90                 | 0.09        | < LOD            | 6.70             | 24.13                 |
| 1        | Cingulate Gyrus      | MSA-P     | 2.26                  | 0.27        | < LOD            | 10.6             | 5.17                  |
| 2        | Cerebellum           | MSA-P     | 7.52                  | 0.49        | < LOD            | 3.89             | 12.73                 |
| 3        | Cerebellum           | MSA-P     | 19.01                 | 0.10        | 2.98             | 13.98            | 5.88                  |
| 3        | Middle Frontal Gyrus | MSA-P     | 1.79                  | 0.43        | < LOD            | 5.50             | 13.74                 |
| 4        | Middle Frontal Gyrus | MSA-P     | 6.60                  | 0.47        | < LOD            | < LOD            | 8.52                  |
| 5        | Middle Frontal Gyrus | MSA-C     | 5.54                  | 0.53        | < LOD            | 24.75            | 13.73                 |
| 6        | Middle Frontal Gyrus | MSA-C     | 40.00                 | 0.09        | < LOD            | < LOD            | 20.33                 |
| 7        | Middle Frontal Gyrus | AD        | 8.01                  | 17.64       | 14.64            | 53.55            | 11.09                 |
| 8        | Middle Frontal Gyrus | AD        | 13.55                 | 26.00       | 10.00            | 82.30            | 14.40                 |
| 9        | Cingulate Gyrus      | DLB       | 7.55                  | 2.12        | < LOD            | 73.72            | 12.30                 |
| 10       | Cingulate Gyrus      | PDD       | 20.66                 | 0.77        | < LOD            | 6.00             | 41.11                 |
| 11       | Middle Frontal Gyrus | PDD       | 7.43                  | 0.19        | < LOD            | 22.75            | 12.76                 |
| 12       | Cingulate Gyrus      | PDD       | 8.49                  | 0.77        | 1.98             | 58.47            | 8.85                  |
| 13       | Cingulate Gyrus      | PDD       | 15.87                 | 2.49        | 0.75             | 89.12            | 7.74                  |
| 14       | Cingulate Gyrus      | PDD       | 9.52                  | 4.35        | 11.00            | 33.00            | 14.13                 |
| 15       | Cingulate Gyrus      | PDD       | 8.28                  | 1.50        | < LOD            | 77.00            | 12.56                 |
| 16       | Middle Frontal Gyrus | Normal    | 0.2                   | 0.12        | 3.85             | 15.67            | 7.43                  |
| 30       | Middle Frontal Gyrus | Normal    | 0.45                  | 0.46        | < LOD            | < LOD            | 11.68                 |
| 31       | Cingulate Gyrus      | Normal    | 0.40                  | 0.36        | < LOD            | < LOD            | 16.28                 |
| 32       | Cingulate Gyrus      | Normal    | 0.39                  | 0.50        | < LOD            | 18.79            | 14.56                 |
| 33       | Middle Frontal Gyrus | Normal    | 0.52                  | 0.62        | < LOD            | < LOD            | 16.94                 |

**LOD: limit of detection**

**Supplementary Table 3 Quantification of  $\alpha$ -Syn in the Sarkosyl Insoluble Fraction of Neuronal Culture Extractions.**

| <b>Sample</b> | <b>Total <math>\alpha</math>-Syn (ng/uL)</b> | <b>Human <math>\alpha</math>-Syn (ng/uL)</b> | <b>Percentage of Human <math>\alpha</math>-Syn to Total <math>\alpha</math>-Syn</b> |
|---------------|----------------------------------------------|----------------------------------------------|-------------------------------------------------------------------------------------|
| GCI1-N-P1     | 127.7                                        | <0.15                                        | <0.12%                                                                              |
| GCI2-N-P1     | 65.1                                         | <0.15                                        | <0.23%                                                                              |
| GCI3-N-P1     | 65.5                                         | <0.15                                        | <0.23%                                                                              |

**Supplementary Table 4 Antibodies Used in This Study.**

| <b>Antibody</b> | <b>Specificity</b>                                           | <b>Host species</b> | <b>Dilution</b>                          | <b>Source or Reference</b>                                                                                                                                  |
|-----------------|--------------------------------------------------------------|---------------------|------------------------------------------|-------------------------------------------------------------------------------------------------------------------------------------------------------------|
| 81A             | p- $\alpha$ -syn (phosphorylated at Ser 129)                 | mouse monoclonal    | 1:5000 (ICC), 1:1000 (WB), 1:10000 (IHC) | 1                                                                                                                                                           |
| SNL-4           | $\alpha$ -syn (amino acids 2-11)                             | rabbit polyclonal   | 1:500 (WB)                               | 2                                                                                                                                                           |
| Syn506          | misfolded $\alpha$ -syn                                      | mouse monoclonal    | 1:5000 (IHC), 1:2500 (IF)                | 1                                                                                                                                                           |
| NAC1            | $\alpha$ -syn (amino acids 75-91)                            | rabbit polyclonal   | 1:500 (WB)                               | 3                                                                                                                                                           |
| LB509           | $\alpha$ -syn (amino acids 115-122)                          | mouse monoclonal    | 1:500 (WB); 1:2500 (IF)                  | 4                                                                                                                                                           |
| Syn211          | $\alpha$ -syn (amino acids 121-125)                          | mouse monoclonal    | 1:500 (WB)                               | 5                                                                                                                                                           |
| Syn102          | $\alpha$ -syn (amino acids 131-140)                          | mouse monoclonal    | 1:500 (WB)                               | 6                                                                                                                                                           |
| HuA             | Raised against recombinant human $\alpha$ -syn               | rabbit polyclonal   | 3.3ng/ $\mu$ l (ELISA); 1:500 (WB)       | 7                                                                                                                                                           |
| Syn9027         | $\alpha$ -syn (amino acids 130-140)                          | mouse monoclonal    | 3.3ng/ $\mu$ l (ELISA); 1:20000 (WB); IP | 8                                                                                                                                                           |
| MJF-R1          | human $\alpha$ -syn                                          | rabbit monoclonal   | 1:1000 (ELISA)                           | Abcam (ab138501)                                                                                                                                            |
| SNL-1           | $\alpha$ -syn (C-terminal)                                   | rabbit polyclonal   | 1:500 (WB)                               | 2                                                                                                                                                           |
| Olig-2          | Oligodendrocyte transcription factor 2 (Olig-2)              | rabbit polyclonal   | 1:500 (IF and ICC)                       | Millipore (AB9610)                                                                                                                                          |
| Iba1            | Macrophage/Microglia-Specific Calcium-Binding Protein (Iba1) | rabbit polyclonal   | 1:500 (IF) and 1:250 (ICC)               | Wako (019-19741)                                                                                                                                            |
| GFAP            | Glial Fibrillary Acidic Protein                              | rabbit polyclonal   | 1:1000 (IF) and 1:500 (ICC)              | Dako (Z0334)                                                                                                                                                |
| NeuN            | Neuronal Nuclei (NeuN)                                       | rabbit polyclonal   | 1:1000 (IF) and 1:500 (ICC)              | Millipore (ABN78)                                                                                                                                           |
| MAP2            | Microtubule-Associated Protein 2 (MAP2)                      | rabbit polyclonal   | 1:2000 (ICC)                             | 9                                                                                                                                                           |
| PLP             | proteolipid protein                                          | Rat monoclonal      | 1:1 (ICC)                                | Gift from Dr. Judith B. Grinspan, CHOP, Philadelphia, PA <sup>10</sup> . The antibody was originally from Dr. Alex Gow, Wayne State University, Detroit, MI |
| CNP             | 2',3'-Cyclic-nucleotide 3'-phosphodiesterase                 | rabbit polyclonal   | 1:500 (ICC)                              | 11                                                                                                                                                          |
| Syn204          | $\alpha$ -syn (amino acids 87-110)                           | mouse monoclonal    | 1:500 (WB)                               | 5                                                                                                                                                           |
| Syn303          | $\alpha$ -syn                                                | mouse monoclonal    | 1:60000 (IHC)                            | 12                                                                                                                                                          |
| Syn7015         | Raised against strain A $\alpha$ -syn fibrils                | mouse monoclonal    | 1ng/ml (IHC)                             | 8                                                                                                                                                           |

|                     |                     |                   |              |                                  |
|---------------------|---------------------|-------------------|--------------|----------------------------------|
| Mouse $\alpha$ -syn | Mouse $\alpha$ -syn | Rabbit monoclonal | 1:1000 (WB)  | Cell Signaling Technology (4179) |
| $\beta$ -tubulin    | $\beta$ -tubulin    | mouse monoclonal  | 1:3000 (WB)  | Invitrogen (32-2600)             |
| GAPDH               | GAPDH               | mouse monoclonal  | 1:18000 (WB) | Advanced Immunochemical (2-RGM2) |

**Supplementary Table 5 Statistics.**

| Figure #  | Compare (Group size n=)                                                             | Statistical methods                                                                    | P Value | t Value | F value | Degrees of freedom |
|-----------|-------------------------------------------------------------------------------------|----------------------------------------------------------------------------------------|---------|---------|---------|--------------------|
| Figure 1b | LB vs GCI (LB, n=7; GCI, n=5 different cases)                                       | two tailed, unpaired t-test                                                            | 0.0009  | 4.69    |         | 10                 |
| Figure 1e | LB-7015 vs GCI-7015 (LB, n=9, GCI, n=7 different cases)                             | Mann Whitney U test                                                                    | 0.0157  |         |         |                    |
| Figure 1f | LB vs GCI (LB, n=9, GCI, n=7 different cases)                                       | two tailed, unpaired t-test                                                            | 0.001   | 4.149   |         | 14                 |
| Figure 1i | All LB vs All GCI (LB, n=9; GCI, n=8 different preparations)                        | two tailed, unpaired t-test with Welch's correction, using the mean value of each case | 0.0015  | 5.023   |         | 7.001              |
| Figure 1j | 30ng LB vs 30pg GCI (LB, n=6; GCI, n=5 biologically independent replicates)         | two tailed, unpaired t-test with Bonferroni correction                                 | 0.9693  | 0.03952 |         | 9                  |
| Figure 1j | 30ng GCI vs 30 $\mu$ g PFF (GCI, n=5; PFF, n=5 biologically independent replicates) | two tailed, unpaired t-test with Bonferroni correction                                 | 0.296   | 1.118   |         | 8                  |
| Figure 2b | All LB vs All GCI (GCI, n=8, LB, n=9 different preparations)                        | two tailed, unpaired t-test with Welch's correction, using the mean value of each case | <0.0001 | 13.51   |         | 7.067              |
| Figure 2c | 100pg GCI vs 100ng PFF (n=3 biologically independent replicates)                    | two tailed, unpaired t-test with Bonferroni correction                                 | 0.8687  | 0.1762  |         | 4                  |
| Figure 2d | 10pg GCI vs 10ng LB (n=3 biologically independent replicates)                       | two tailed, unpaired t-test with Bonferroni correction                                 | 0.5405  | 0.6683  |         | 4                  |



|           |                                                                                 |                                                     |                                                                 |       |                                                            |                                                     |
|-----------|---------------------------------------------------------------------------------|-----------------------------------------------------|-----------------------------------------------------------------|-------|------------------------------------------------------------|-----------------------------------------------------|
| Figure 2f | 2ng LB vs 2pg GCI (LB, n=7; GCI, n=4 biologically independent replicates)       | two tailed, unpaired t-test                         | 0.2019                                                          | 1.377 |                                                            | 9                                                   |
| Figure 2f | 200pg GCI vs 200ng PFF (GCI, n=4; PFF, n=3 biologically independent replicates) | two tailed, unpaired t-test                         | 0.0989                                                          | 2.024 |                                                            | 5                                                   |
| Figure 2g | GCI-WT vs LB-WT at 3 mpi (n=3 mice for both GCI-WT and LB-WT)                   | two tailed, unpaired t-test with Welch's correction | 0.0417                                                          | 4.744 |                                                            | 2.001                                               |
| Figure 2h | All groups                                                                      | Two-way ANOVA, with Tukey's HSD                     | Brain region: p<0.0001; Strains: p=0.2074; Interaction p<0.0001 |       | Brain region: F=60.98; Strain: F=1.613; Interaction F=18.5 | Brain region: Df=8; Strain: Df=2; Interaction Df=16 |
| Figure 2h | Cotex: GCI-WT vs PFF-WT (GCI-WT, n=3; PFF-WT, n=4 mice)                         | Two-way ANOVA, with Tukey's HSD                     | <0.0001                                                         |       |                                                            |                                                     |
| Figure 2h | Cotex: GCI-WT vs LB-WT (n=3 mice for both GCI-WT and LB-WT)                     | Two-way ANOVA, with Tukey's HSD                     | <0.0001                                                         |       |                                                            |                                                     |
| Figure 2h | PIR2: GCI-WT vs PFF-WT (GCI-WT, n=3; PFF-WT, n=4 mice)                          | Two-way ANOVA, with Tukey's HSD                     | <0.0001                                                         |       |                                                            |                                                     |
| Figure 2h | PIR2: GCI-WT vs PFF-WT (GCI-WT, n=3; PFF-WT, n=4 mice)                          | Two-way ANOVA, with Tukey's HSD                     | <0.0001                                                         |       |                                                            |                                                     |
| Figure 2h | Str: GCI-WT vs PFF-WT (GCI-WT, n=3; PFF-WT, n=4 mice)                           | Two-way ANOVA, with Tukey's HSD                     | p=0.0003                                                        |       |                                                            |                                                     |
| Figure 2h | Str: LB-WT vs PFF-WT (LB-WT, n=3; PFF-WT, n=4 mice)                             | Two-way ANOVA, with Tukey's HSD                     | p=0.0055                                                        |       |                                                            |                                                     |
| Figure 2h | Hippo: GCI-WT vs PFF-WT (GCI-WT, n=3; PFF-WT, n=4 mice)                         | Two-way ANOVA, with Tukey's HSD                     | p=0.0199                                                        |       |                                                            |                                                     |
| Figure 2h | Hippo: GCI-WT vs LB-WT (n=3 mice for both GCI-WT and LB-WT)                     | Two-way ANOVA, with Tukey's HSD                     | p=0.0599                                                        |       |                                                            |                                                     |
| Figure 2i | all groups                                                                      | Two-way ANOVA, with Tukey's HSD                     | Brain region: p<0.0001; Strains: p=0.0027;                      |       | Brain region: F=29.89; Strain: F=6.496;                    | Brain region: Df=8; Strain: Df=2; Interaction Df=16 |

|           |                                                                       |                                                                                          |                         |       |                        |                                                            |
|-----------|-----------------------------------------------------------------------|------------------------------------------------------------------------------------------|-------------------------|-------|------------------------|------------------------------------------------------------|
|           |                                                                       |                                                                                          | Interaction<br>p<0.0001 |       | Interaction<br>F=4.673 |                                                            |
| Figure 2i | Cotex: GCI-WT vs PFF-WT (GCI-WT, n=3; PFF-WT, n=4 mice)               | Two-way ANOVA, with Tukey's HSD                                                          | <0.0001                 |       |                        |                                                            |
| Figure 2i | Cotex: GCI-WT vs LB-WT (n=3 mice for both GCI-WT and LB-WT)           | Two-way ANOVA, with Tukey's HSD                                                          | <0.0001                 |       |                        |                                                            |
| Figure 3b | GCI-KOM2 vs LB-KOM2 at 1 mpi (n=3 mice for both GCI-KOM2 and LB-KOM2) | two tailed, unpaired t-test with Bonferroni correction                                   | <0.0001                 | 18.61 |                        | 4                                                          |
| Figure 3b | GCI-KOM2 vs LB-KOM2 at 3 mpi (n=5 mice for both GCI-KOM2 and LB-KOM2) | two tailed, unpaired t-test with Welch's correction and Bonferroni correction            | 0.3391                  | 1.067 |                        | 4.583                                                      |
| Figure 3b | GCI-KOM2 vs LB-KOM2 at 6 mpi (n=5 mice for both GCI-KOM2 and LB-KOM2) | two tailed, unpaired t-test with Welch's correction and Bonferroni correction            | 0.1308                  | 1.835 |                        | 4.616                                                      |
| Figure 3c | All groups                                                            | One-way Anova with Dunnett's Multiple Comparison Test comparing each group with LB-KOM2  | 0.0041                  |       | 6.566                  | between columns: Df=4; within columns: Df=13; Total: Df=17 |
| Figure 3c | LB-KOM2 vs GCI (LB-KOM2, n=4 mice; GCI, n=3 cases)                    | One-way Anova with Dunnett's Multiple Comparison Test                                    | 0.2193                  |       |                        |                                                            |
| Figure 3c | LB-KOM2 vs LB (n=4 mice; for LB-KOM2; n=3 cases for LB)               | One-way Anova with Dunnett's Multiple Comparison Test                                    | 0.0043                  |       |                        |                                                            |
| Figure 3c | LB-KOM2 vs GCI-KOM2 (n=4 mice for both LB-KOM2 and GCI-KOM2)          | One-way Anova with Dunnett's Multiple Comparison Test                                    | 0.2                     |       |                        |                                                            |
| Figure 3c | LB-KOM2 vs M83 (n=4 mice for both LB-KOM2 and M83)                    | One-way Anova with Dunnett's Multiple Comparison Test                                    | 0.0024                  |       |                        |                                                            |
| Figure 3e | NI vs GCI (n=6 cases for both NI and GCI)                             | two tailed, unpaired t-test                                                              | 0.0002                  | 5.734 |                        | 10                                                         |
| Figure 4c | All groups                                                            | One-way Anova with Dunnett's Multiple Comparison Test comparing each group with PFF-KOM2 | <0.0001                 |       | 65.39                  | between columns: Df=4; within columns: Df=15; Total: Df=19 |

|           |                                                                                                                       |                                                                                               |         |       |       |                                                            |
|-----------|-----------------------------------------------------------------------------------------------------------------------|-----------------------------------------------------------------------------------------------|---------|-------|-------|------------------------------------------------------------|
| Figure 4c | PFF-KOM2 200pg vs PFF 200pg (PFF-KOM2, n=6; PFF n=3 biologically independent replicates)                              | One-way Anova with Dunnett's Multiple Comparison Test                                         | 0.0045  |       |       |                                                            |
| Figure 4c | PFF-KOM2 200pg vs PFF 2ng (PFF-KOM2, n=6; PFF n=3 biologically independent replicates)                                | One-way Anova with Dunnett's Multiple Comparison Test                                         | 0.0205  |       |       |                                                            |
| Figure 4c | PFF-KOM2 200pg vs PFF 20ng (PFF-KOM2, n=6; PFF n=3 biologically independent replicates)                               | One-way Anova with Dunnett's Multiple Comparison Test                                         | 0.0001  |       |       |                                                            |
| Figure 4c | PFF-KOM2 200pg vs KOM2 + PFF ( PFF-KOM2, n=6; KOM2 + PFF n=5 biologically independent replicates)                     | One-way Anova with Dunnett's Multiple Comparison Test                                         | 0.002   |       |       |                                                            |
| Figure 4d | LB-KOM2 vs LB (LB-KOM2, n=7; LB, n=3 biologically independent replicates)                                             | two tailed, unpaired t-test                                                                   | 0.0439  | 2.389 |       | 8                                                          |
| Figure 4f | All Groups                                                                                                            | One-way Anova with Dunnett's Multiple Comparison Test comparing each group with PFF-Oligo-Syn | <0.0001 |       | 130.4 | between columns: Df=7; within columns: Df=23; Total: Df=30 |
| Figure 4f | PFF-Oligo-Syn 200pg vs PFF-RatH-Syn 200pg (PFF-Oigo-Syn, n=6; PFF-RatH-Syn, n=4 biologically independent replicates)  | One-way Anova with Dunnett's Multiple Comparison Test                                         | 0.0001  |       |       |                                                            |
| Figure 4f | PFF-Oligo-Syn 200pg vs PFF-RatC-Syn 200pg (PFF-Oigo-Syn, n=6; PFF-RatC-Syn, n=4 biologically independent replicates ) | One-way Anova with Dunnett's Multiple Comparison Test                                         | 0.0001  |       |       |                                                            |
| Figure 4f | PFF-Oligo-Syn 200pg vs PFF-QBI-Syn 200pg (PFF-Oigo-Syn, n=6; PFF-QBI-Syn, n=4 biologically independent replicates)    | One-way Anova with Dunnett's Multiple Comparison Test                                         | 0.0001  |       |       |                                                            |
| Figure 4f | PFF-Oligo-Syn 200pg vs PFF 200pg (PFF-Oigo-Syn, n=6; PFF, n=4 biologically independent replicates)                    | One-way Anova with Dunnett's Multiple Comparison Test                                         | 0.0001  |       |       |                                                            |

|           |                                                                                                    |                                                                                                  |         |  |       |                                                          |
|-----------|----------------------------------------------------------------------------------------------------|--------------------------------------------------------------------------------------------------|---------|--|-------|----------------------------------------------------------|
| Figure 4f | PFF-Oligo-Syn 200pg vs PFF 2ng (PFF-Oigo-Syn, n=6; PFF, n=3 biologically independent replicates)   | One-way Anova with Dunnett's Multiple Comparison Test                                            | 0.0001  |  |       |                                                          |
| Figure 4f | PFF-Oligo-Syn 200pg vs PFF 20ng (PFF-Oigo-Syn, n=6; PFF, n=3 biologically independent replicates)  | One-way Anova with Dunnett's Multiple Comparison Test                                            | 0.9999  |  |       |                                                          |
| Figure 4f | PFF-Oligo-Syn 200pg vs PFF 200ng (PFF-Oigo-Syn, n=6; PFF, n=3 biologically independent replicates) | One-way Anova with Dunnett's Multiple Comparison Test                                            | 0.0001  |  |       |                                                          |
| Figure 4h | All Groups                                                                                         | One-way Anova with Dunnett's Multiple Comparison Test                                            | 0.0025  |  | 7.913 | between columns: Df=3; within ccols: Df=14; Total: Df=17 |
| Figure 4h | Oligo-PFF vs RatC-PFF (Oligo-PFF, n=6; RatC-PFF, n=4 biologically independent replicates)          | One-way Anova with Dunnett's Multiple Comparison Test                                            | 0.0107  |  |       |                                                          |
| Figure 4h | Oligo-PFF vs RatH-PFF (Oligo-PFF, n=6; RatH-PFF, n=4 biologically independent replicates)          | One-way Anova with Dunnett's Multiple Comparison Test                                            | 0.0045  |  |       |                                                          |
| Figure 4h | Oligo-PFF vs PFF (Oligo-PFF, n=6; PFF, n=4 biologically independent replicates)                    | One-way Anova with Dunnett's Multiple Comparison Test                                            | 0.004   |  |       |                                                          |
| Figure 4j | All Groups                                                                                         | One-way Anova with Dunnett's Multiple Comparison Test comparing each group with GCI 200pg group. | <0.0001 |  | 16.88 | between columns: Df=9; within ccols: Df=28; Total: Df=37 |
| Figure 4j | GCI 200pg vs GCI-N-P1 200pg (GCI, n=3; GCI-N-P1, n=5 biologically independent replicates)          | One-way Anova with Dunnett's Multiple Comparison Test                                            | 0.3584  |  |       |                                                          |
| Figure 4j | GCI 200pg vs GCI-N-P2 200pg (GCI, n=3; GCI-N-P2, n=4 biologically independent replicates)          | One-way Anova with Dunnett's Multiple Comparison Test                                            | 0.3156  |  |       |                                                          |
| Figure 4j | GCI 200pg vs GCI-N-P3 200pg (GCI, n=3; GCI-N-P1, n=4 biologically independent replicates)          | One-way Anova with Dunnett's Multiple Comparison Test                                            | 0.9049  |  |       |                                                          |

|                       |                                                                                                         |                                                                                        |         |       |       |                                                            |
|-----------------------|---------------------------------------------------------------------------------------------------------|----------------------------------------------------------------------------------------|---------|-------|-------|------------------------------------------------------------|
| Figure 4j             | GCI 200pg vs PFF 200ng (GCI, n=3; GCI-N-P1, n=3 biologically independent replicates)                    | One-way Anova with Dunnett's Multiple Comparison Test                                  | 0.1082  |       |       |                                                            |
| Figure 4l             | All Groups                                                                                              | One-way Anova with Tukey's Multiple Comparison Test                                    | <0.0001 |       | 44.43 | between columns: Df=3; within columns: Df=24; Total: Df=27 |
| Figure 4l             | GCI vs GCI-M-P1 (GCI, n=8; GCI-M-P1, n=6 biologically independent replicates)                           | One-way Anova with Tukey's Multiple Comparison Test                                    | 0.2562  |       |       |                                                            |
| Figure 4l             | GCI-M-P1 vs LB-M-P1 (n=6 biologically independent replicates for both GCI-M-P1 and LB-M-P1)             | One-way Anova with Tukey's Multiple Comparison Test                                    | <0.0001 |       |       |                                                            |
| Figure 4l             | LB vs LB-M-P1 (LB, n=8; LB-M-P1, n=6 biologically independent replicates)                               | One-way Anova with Tukey's Multiple Comparison Test                                    | 0.9944  |       |       |                                                            |
| Extended data Fig. 2b | LB vs GCI at Syn7015 15ng/ml (LB, n=5; GCI, n=4 cases)                                                  | two tailed, unpaired t-test                                                            | 0.0423  | 2.479 |       | 7                                                          |
| Extended data Fig. 2b | LB vs GCI at Syn7015 5ng/ml (LB, n=5; GCI, n=4 cases)                                                   | two tailed, unpaired t-test                                                            | 0.0153  | 3.187 |       | 7                                                          |
| Extended data Fig. 2b | LB vs GCI at Syn7015 1.67ng/ml (LB, n=5; GCI, n=4 cases)                                                | two tailed, unpaired t-test                                                            | 0.0435  | 2.459 |       | 7                                                          |
| Extended data Fig. 3b | All GCI vs All LB (n=3 biologically independent replicates for MSA-P, MSA-C, AD, PDD, DLB, PFF and PBS) | two tailed, unpaired t-test with Welch's correction                                    | 0.0012  | 6.621 |       | 5.003                                                      |
| Extended data Fig. 4b | All GCI vs All LB (n=3 biologically independent replicates for MSA-P, MSA-C, AD, PDD, DLB, PFF and PBS) | two tailed, unpaired t-test with Welch's correction                                    | 0.0071  | 4.387 |       | 5.008                                                      |
| Extended data Fig. 4c | All LB vs All GCI (LB, n=9; GCI, n=8 different preparations]                                            | two tailed, unpaired t-test with Welch's correction, using the mean value of each case | <0.0001 | 12.71 |       | 7.102                                                      |
| Extended data Fig. 4e | All GCI vs All LB (n=3 biologically independent replicates for MSA-P, MSA-C,                            | two tailed, unpaired t-test with Welch's correction                                    | 0.0012  | 6.621 |       | 5.003                                                      |

|                       |                                                                                                             |                                                        |                                                               |        |                                                            |                                                             |
|-----------------------|-------------------------------------------------------------------------------------------------------------|--------------------------------------------------------|---------------------------------------------------------------|--------|------------------------------------------------------------|-------------------------------------------------------------|
|                       | AD, PDD, DLB, PFF and PBS)                                                                                  |                                                        |                                                               |        |                                                            |                                                             |
| Extended data Fig. 4f | All Group                                                                                                   | One-way Anova with Tukey's Multiple Comparison Test    | <0.0001                                                       |        | 33.44                                                      | between columns: Df=11; within columns: Df=24; Total: Df=35 |
| Extended data Fig. 4f | 10ng IP purified GCI vs 10ng GCI (n=3 biologically independent replicates for both IP purified GCI and GCI) | One-way Anova with Tukey's Multiple Comparison Test    | 0.9799                                                        |        |                                                            |                                                             |
| Extended data Fig. 4f | 10ng IP purified GCI vs 10ng IP purified LB (n=3 biologically independent replicates for both GCI and LB)   | One-way Anova with Tukey's Multiple Comparison Test    | <0.0001                                                       |        |                                                            |                                                             |
| Extended data Fig. 4g | GCI Depleted vs GCI Depleted + PFF (n=3 biologically independent replicates for both group)                 | two tailed, unpaired t-test with Bonferroni correction | 0.7754                                                        | 0.3052 |                                                            | 4                                                           |
| Extended data Fig. 4g | LB Depleted vs LB Depleted + PFF (n=3 biologically independent replicates for both group)                   | two tailed, unpaired t-test with Bonferroni correction | 0.1986                                                        | 1.539  |                                                            | 4                                                           |
| Extended data Fig. 4h | Depleted GCI + 100ng PFF vs 100ng PFF (n=3 biologically independent replicates for both group)              | two tailed, unpaired t-test with Bonferroni correction | 0.6536                                                        | 0.4841 |                                                            | 4                                                           |
| Extended data Fig. 4i | All group                                                                                                   | Two-way ANOVA, with Sidak's multiple comparisons test  | Strains p<0.0001; Ch treatment p<0.0001; interaction p<0.0001 |        | Strains F=24.66; Ch treatment F=71.89; interaction F=25.65 | Strains Df=2; Ch treatment Df=1; interaction Df=2           |
| Extended data Fig. 4i | GCI without Ch vs GCI with Ch (n=3 biologically independent replicates for both group)                      | Two-way ANOVA, with Sidak's multiple comparisons test  | <0.0001                                                       |        |                                                            |                                                             |
| Extended data Fig. 4i | PFF without Ch vs PFF with Ch (n=3 biologically independent replicates for both group)                      | Two-way ANOVA, with Sidak's multiple comparisons test  | 0.0065                                                        |        |                                                            |                                                             |

|                       |                                                                                        |                                                                               |                                                               |        |                                                           |                                                   |
|-----------------------|----------------------------------------------------------------------------------------|-------------------------------------------------------------------------------|---------------------------------------------------------------|--------|-----------------------------------------------------------|---------------------------------------------------|
| Extended data Fig. 4i | GCI with Ch vs PFF with Ch (n=3 biologically independent replicates for both group)    | Two-way ANOVA, with Sidak's multiple comparisons test                         | 0.0036                                                        |        |                                                           |                                                   |
| Extended data Fig. 4j | All group                                                                              | Two-way ANOVA, with Sidak's multiple comparisons test                         | Strains p<0.0001; Ch treatment p<0.0001; interaction p=0.0003 |        | Strains F=17.93; Ch treatment F=92.1; interaction F=13.52 | Strains Df=2; Ch treatment Df=1; interaction Df=2 |
| Extended data Fig. 4j | GCI without Ch vs GCI with Ch (n=3 biologically independent replicates for both group) | Two-way ANOVA, with Sidak's multiple comparisons test                         | <0.0001                                                       |        |                                                           |                                                   |
| Extended data Fig. 4j | PFF without Ch vs PFF with Ch (n=3 biologically independent replicates for both group) | Two-way ANOVA, with Sidak's multiple comparisons test                         | <0.0001                                                       |        |                                                           |                                                   |
| Extended data Fig. 4j | GCI with Ch vs PFF with Ch (n=3 biologically independent replicates for both group)    | Two-way ANOVA, with Sidak's multiple comparisons test                         | 0.2822                                                        |        |                                                           |                                                   |
| Extended data Fig. 4k | GCI-WT vs LB-WT at 6 mpi (n=3 mice for both GCI-WT and LB-WT)                          | two tailed, unpaired t-test with Welch's correction                           | 0.2852                                                        | 1.445  |                                                           | 2.002                                             |
| Extended data Fig. 7b | GCI-KOM2 vs LB-KOM2 at 1 mpi (n=3 mice for both GCI-KOM2 and LB-KOM2)                  | two tailed, unpaired t-test with Welch's correction and Bonferroni correction | 0.0515                                                        | 4.212  |                                                           | 2.012                                             |
| Extended data Fig. 7b | GCI-KOM2 vs LB-KOM2 at 3 mpi (n=5 mice for both GCI-KOM2 and LB-KOM2)                  | two tailed, unpaired t-test with Welch's correction and Bonferroni correction | 0.267                                                         | 1.259  |                                                           | 4.694                                             |
| Extended data Fig. 7b | GCI-KOM2 vs LB-KOM2 at 6 mpi (n=5 mice for both GCI-KOM2 and LB-KOM2)                  | two tailed, unpaired t-test with Welch's correction and Bonferroni correction | 0.1069                                                        | 2.054  |                                                           | 4.133                                             |
| Extended data Fig. 7c | GCI-KOM2 vs LB-KOM2 at 1 mpi (n=3 mice for both GCI-KOM2 and LB-KOM2)                  | two tailed, unpaired t-test with Welch's correction and Bonferroni correction | 0.0177                                                        | 7.174  |                                                           | 2.046                                             |
| Extended data Fig. 7c | GCI-KOM2 vs LB-KOM2 at 3 mpi (n=5 mice for both GCI-KOM2 and LB-KOM2)                  | two tailed, unpaired t-test with Bonferroni correction                        | 0.5336                                                        | 0.6505 |                                                           | 8                                                 |
| Extended data Fig. 7c | GCI-KOM2 vs LB-KOM2 at 6 mpi (n=5 mice for both GCI-KOM2 and LB-KOM2)                  | two tailed, unpaired t-test with Bonferroni correction                        | 0.0673                                                        | 2.116  |                                                           | 8                                                 |

|                        |                                                                                        |                                                                                               |         |        |       |                                                                     |
|------------------------|----------------------------------------------------------------------------------------|-----------------------------------------------------------------------------------------------|---------|--------|-------|---------------------------------------------------------------------|
| Extended data Fig. 7d  | GCI-KOM2 vs LB-KOM2 at 1 mpi (n=3 mice for both GCI-KOM2 and LB-KOM2)                  | two tailed, unpaired t-test with Welch's correction and Bonferroni correction                 | 0.3468  | 1.22   |       | 2                                                                   |
| Extended data Fig. 7d  | GCI-KOM2 vs LB-KOM2 at 3 mpi (n=5 mice for both GCI-KOM2 and LB-KOM2)                  | two tailed, unpaired t-test with Welch's correction and Bonferroni correction                 | 0.3906  | 0.9617 |       | 4.004                                                               |
| Extended data Fig. 7d  | GCI-KOM2 vs LB-KOM2 at 6 mpi (n=5 mice for both GCI-KOM2 and LB-KOM2)                  | two tailed, unpaired t-test with Welch's correction and Bonferroni correction                 | 0.3183  | 1.139  |       | 4.004                                                               |
| Extended data Fig. 7e  | GCI-KOM2 vs LB-KOM2 at 1 mpi (n=3 mice for both GCI-KOM2 and LB-KOM2)                  | two tailed, unpaired t-test with Welch's correction and Bonferroni correction                 | 0.1661  | 2.136  |       | 2.001                                                               |
| Extended data Fig. 7e  | GCI-KOM2 vs LB-KOM2 at 3 mpi (n=5 mice for both GCI-KOM2 and LB-KOM2)                  | two tailed, unpaired t-test with Welch's correction and Bonferroni correction                 | 0.5626  | 0.6263 |       | 4.334                                                               |
| Extended data Fig. 7e  | GCI-KOM2 vs LB-KOM2 at 6 mpi (n=5 mice for both GCI-KOM2 and LB-KOM2)                  | two tailed, unpaired t-test with Welch's correction and Bonferroni correction                 | 0.0831  | 2.223  |       | 4.477                                                               |
| Extended data Fig. 10d | All Groups                                                                             | One-way Anova with Dunnett's Multiple Comparison Test comparing each group with PFF-Oligo-Syn | <0.0001 |        | 23.56 | between columns:<br>Df=5; within columns:<br>Df=12; Total:<br>Df=17 |
| Extended data Fig. 10d | PFF-Oligo-Syn vs PFF-HipN-Syn (n=3 biologically independent replicates for both group) | One-way Anova with Dunnett's Multiple Comparison Test                                         | 0.0001  |        |       |                                                                     |
| Extended data Fig. 10d | PFF-Oligo-Syn vs PFF-CtxN-Syn (n=3 biologically independent replicates for both group) | One-way Anova with Dunnett's Multiple Comparison Test                                         | 0.0001  |        |       |                                                                     |
| Extended data Fig. 10d | PFF-Oligo-Syn vs PFF-QBI-Syn (n=3 biologically independent replicates for both group)  | One-way Anova with Dunnett's Multiple Comparison Test                                         | 0.0001  |        |       |                                                                     |
| Extended data Fig. 10d | PFF-Oligo-Syn vs PFF (n=3 biologically independent replicates for both group)          | One-way Anova with Dunnett's Multiple Comparison Test                                         | 0.0001  |        |       |                                                                     |
| Extended data Fig. 10d | PFF-Oligo-Syn vs PPBS (n=3 biologically independent replicates for both group)         | One-way Anova with Dunnett's Multiple Comparison Test                                         | 0.0001  |        |       |                                                                     |



|                        |                                                                          |                                                                                     |        |  |       |                                                            |
|------------------------|--------------------------------------------------------------------------|-------------------------------------------------------------------------------------|--------|--|-------|------------------------------------------------------------|
| Extended data Fig. 10g | All Groups                                                               | One-way Anova with Dunnett's Multiple Comparison Test comparing each group with GCI | 0.0003 |  | 11.63 | between columns: Df=5; within columns: Df=12; Total: Df=17 |
| Extended data Fig. 10g | GCI vs GCI-N-P1 (n=3 biologically independent replicates for both group) | One-way Anova with Dunnett's Multiple Comparison Test                               | 0.9998 |  |       |                                                            |
| Extended data Fig. 10g | GCI vs GCI-N-P2 (n=3 biologically independent replicates for both group) | One-way Anova with Dunnett's Multiple Comparison Test                               | 0.6404 |  |       |                                                            |
| Extended data Fig. 10g | GCI vs GCI-N-P3 (n=3 biologically independent replicates for both group) | One-way Anova with Dunnett's Multiple Comparison Test                               | 0.6721 |  |       |                                                            |
| Extended data Fig. 10g | GCI vs PFF (n=3 biologically independent replicates for both group)      | One-way Anova with Dunnett's Multiple Comparison Test                               | 0.0061 |  |       |                                                            |
| Extended data Fig. 10g | GCI vs PBS (n=3 biologically independent replicates for both group)      | One-way Anova with Dunnett's Multiple Comparison Test                               | 0.009  |  |       |                                                            |

### Supplementary References:

- 1 Waxman, E. A. & Giasson, B. I. Specificity and regulation of casein kinase-mediated phosphorylation of alpha-synuclein. *Journal of neuropathology and experimental neurology* **67**, 402-416, doi:10.1097/NEN.0b013e31816fc995 (2008).
- 2 Giasson, B. I., Uryu, K., Trojanowski, J. Q. & Lee, V. M. Mutant and wild type human alpha-synucleins assemble into elongated filaments with distinct morphologies in vitro. *The Journal of biological chemistry* **274**, 7619-7622 (1999).
- 3 Giasson, B. I., Murray, I. V., Trojanowski, J. Q. & Lee, V. M. A hydrophobic stretch of 12 amino acid residues in the middle of alpha-synuclein is essential for filament assembly. *The Journal of biological chemistry* **276**, 2380-2386, doi:10.1074/jbc.M008919200 (2001).
- 4 Jakes, R. *et al.* Epitope mapping of LB509, a monoclonal antibody directed against human alpha-synuclein. *Neuroscience letters* **269**, 13-16 (1999).
- 5 Giasson, B. I. *et al.* A panel of epitope-specific antibodies detects protein domains distributed throughout human alpha-synuclein in Lewy bodies of Parkinson's disease. *Journal of neuroscience research* **59**, 528-533 (2000).
- 6 Tu, P. H. *et al.* Glial cytoplasmic inclusions in white matter oligodendrocytes of multiple system atrophy brains contain insoluble alpha-synuclein. *Annals of neurology* **44**, 415-422, doi:10.1002/ana.410440324 (1998).
- 7 Murray, I. V. *et al.* Role of alpha-synuclein carboxy-terminus on fibril formation in vitro. *Biochemistry* **42**, 8530-8540, doi:10.1021/bi027363r (2003).
- 8 Covell, D. J. *et al.* Novel conformation-selective alpha-synuclein antibodies raised against different in vitro fibril forms show distinct patterns of Lewy pathology in Parkinson's disease. *Neuropathology and applied neurobiology*, doi:10.1111/nan.12402 (2017).

- 9 Volpicelli-Daley, L. A. *et al.* Exogenous alpha-synuclein fibrils induce Lewy body pathology leading to synaptic dysfunction and neuron death. *Neuron* **72**, 57-71, doi:10.1016/j.neuron.2011.08.033 (2011).
- 10 Reid, M. V. *et al.* Delayed myelination in an intrauterine growth retardation model is mediated by oxidative stress upregulating bone morphogenetic protein 4. *Journal of neuropathology and experimental neurology* **71**, 640-653, doi:10.1097/NEN.0b013e31825cfa81 (2012).
- 11 Yazawa, I. *et al.* Mouse model of multiple system atrophy alpha-synuclein expression in oligodendrocytes causes glial and neuronal degeneration. *Neuron* **45**, 847-859, doi:10.1016/j.neuron.2005.01.032 (2005).
- 12 Duda, J. E., Giasson, B. I., Mabon, M. E., Lee, V. M. & Trojanowski, J. Q. Novel antibodies to synuclein show abundant striatal pathology in Lewy body diseases. *Annals of neurology* **52**, 205-210, doi:10.1002/ana.10279 (2002).

# Supplementary Fig. 1. Full blots of western blot data

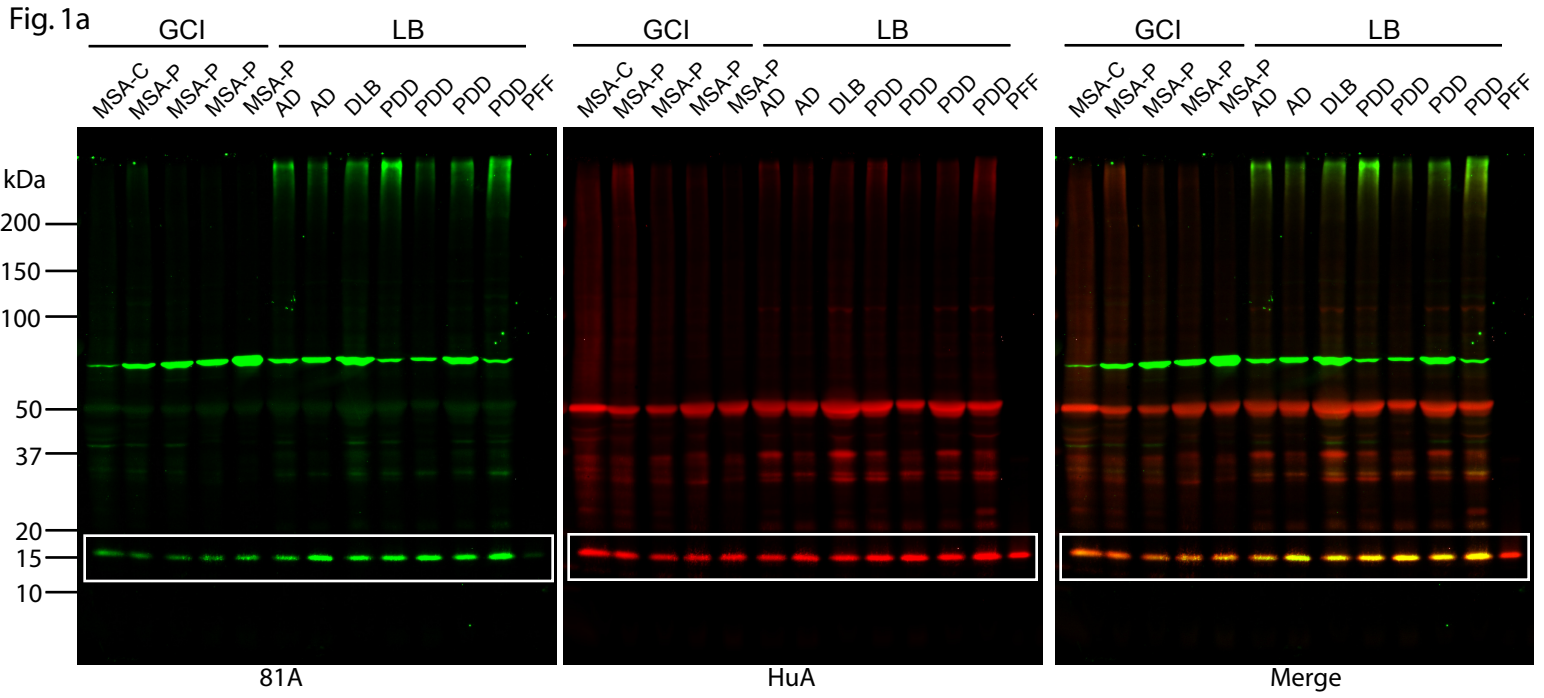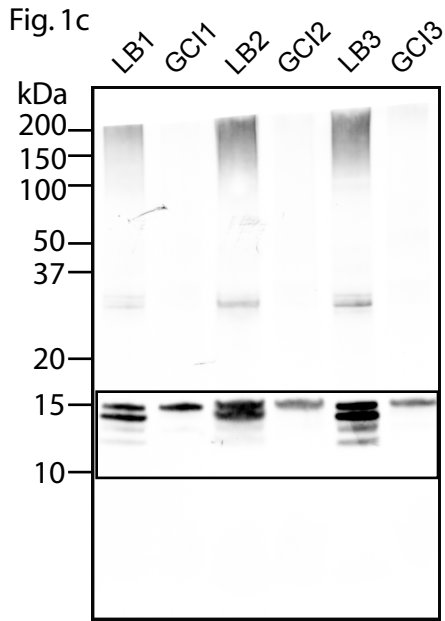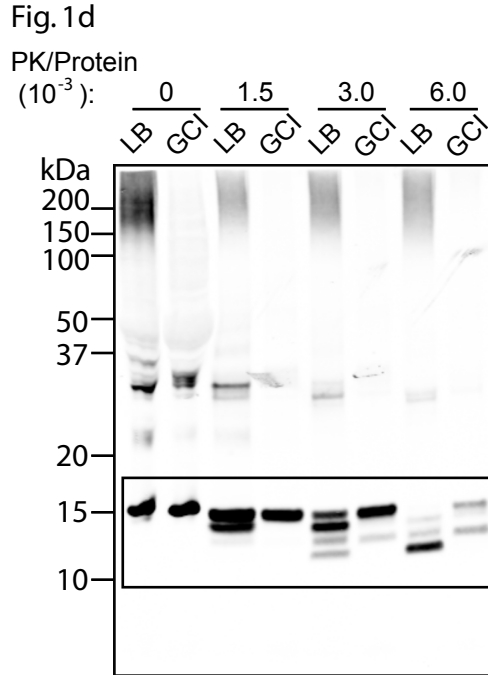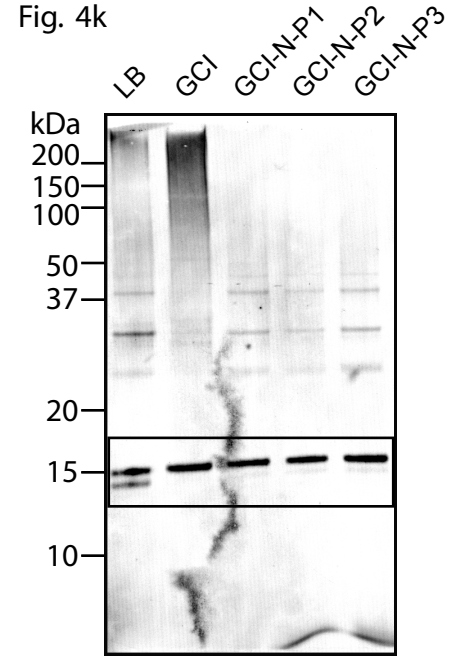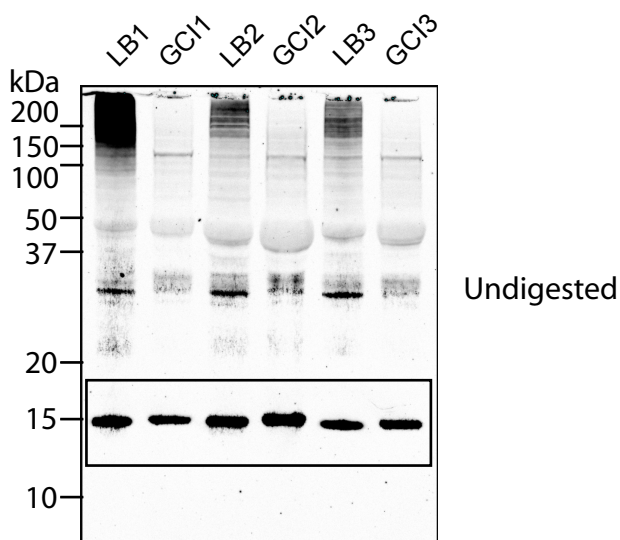

# Supplementary Fig. 1. Full blots of western blot data (Continue)

Extended Data Fig. 1b

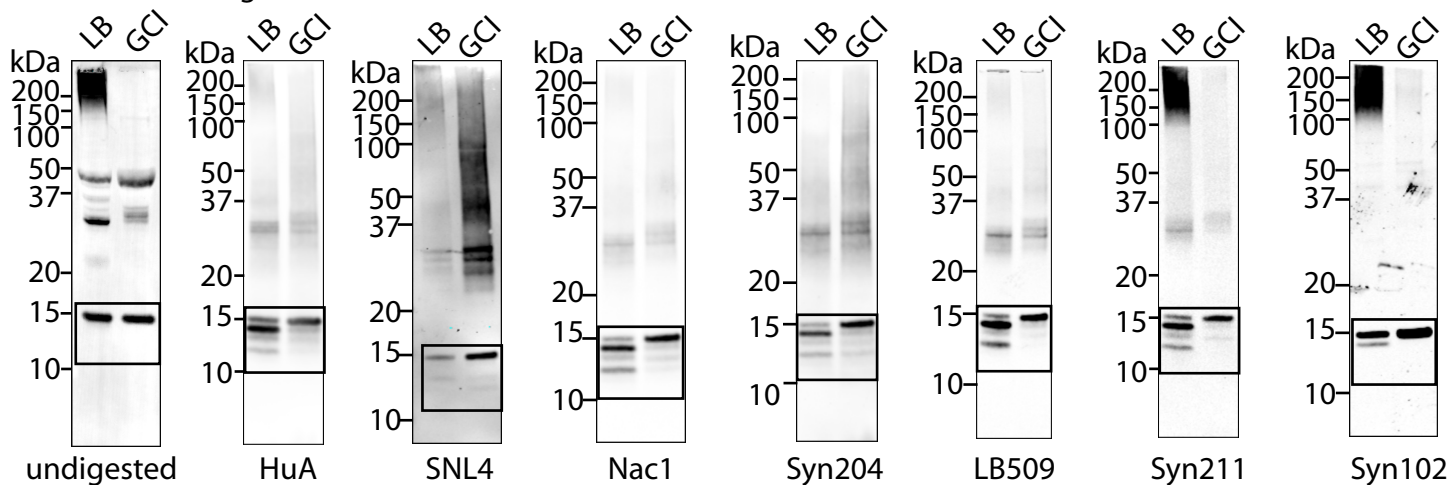

Extended Data Fig. 1d

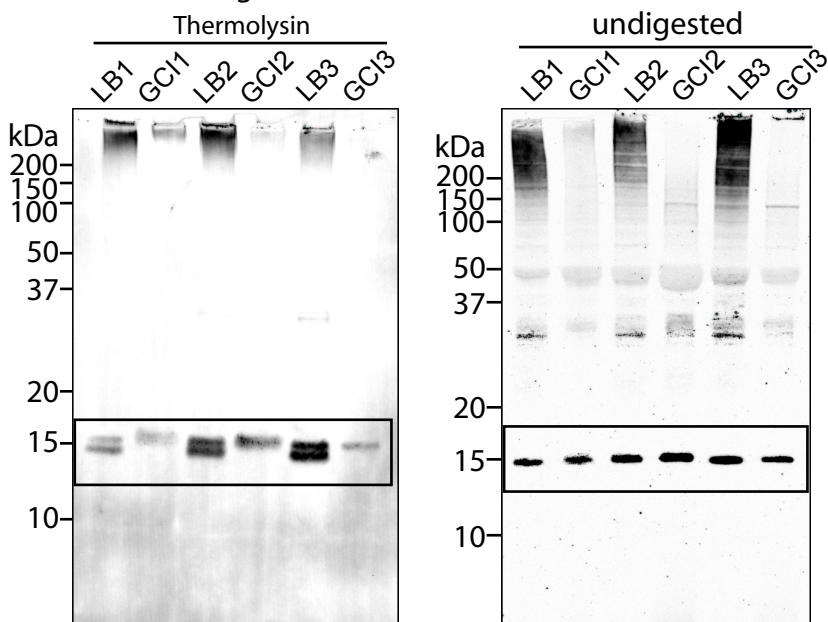

Extended Data Fig. 1e

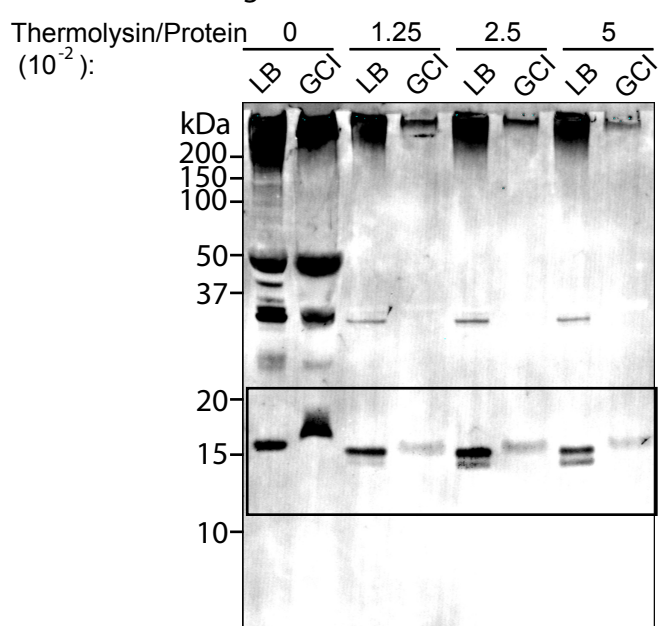

Extended Data Fig. 1f

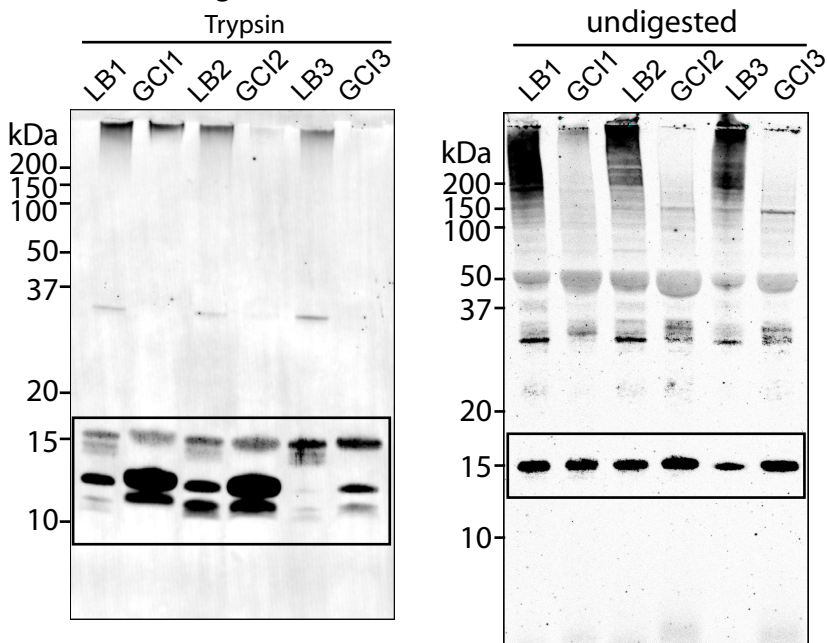

Extended Data Fig. 1g

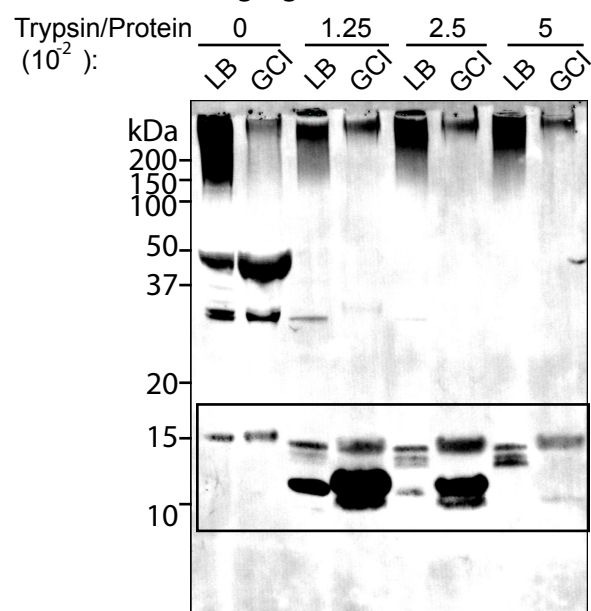

# Supplementary Fig. 1. Full blots of western blot data (Continue)

Extended data fig. 3a

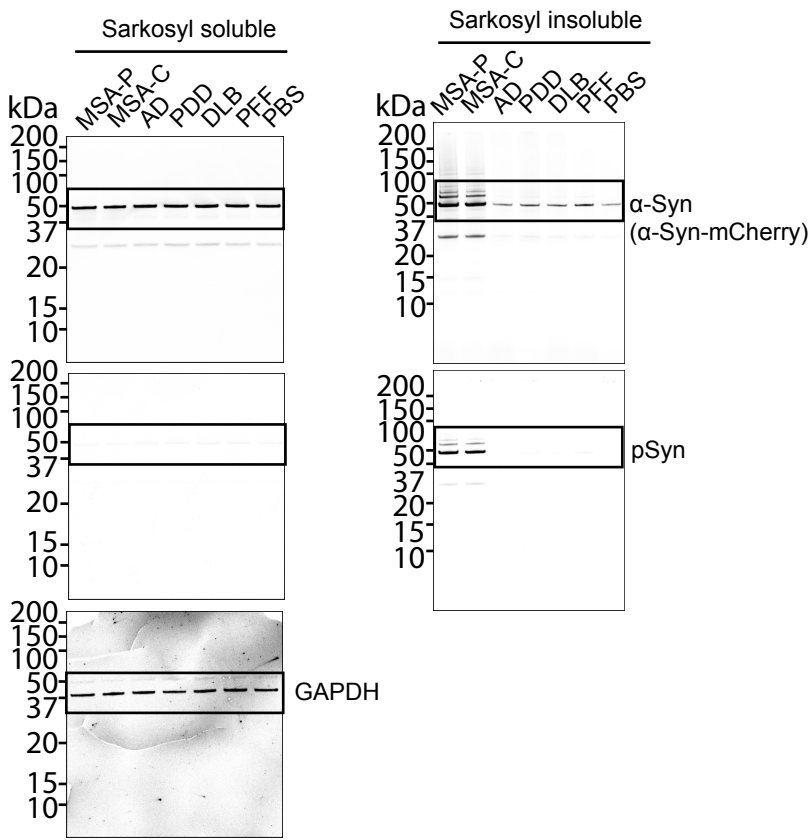

Extended data fig. 4a

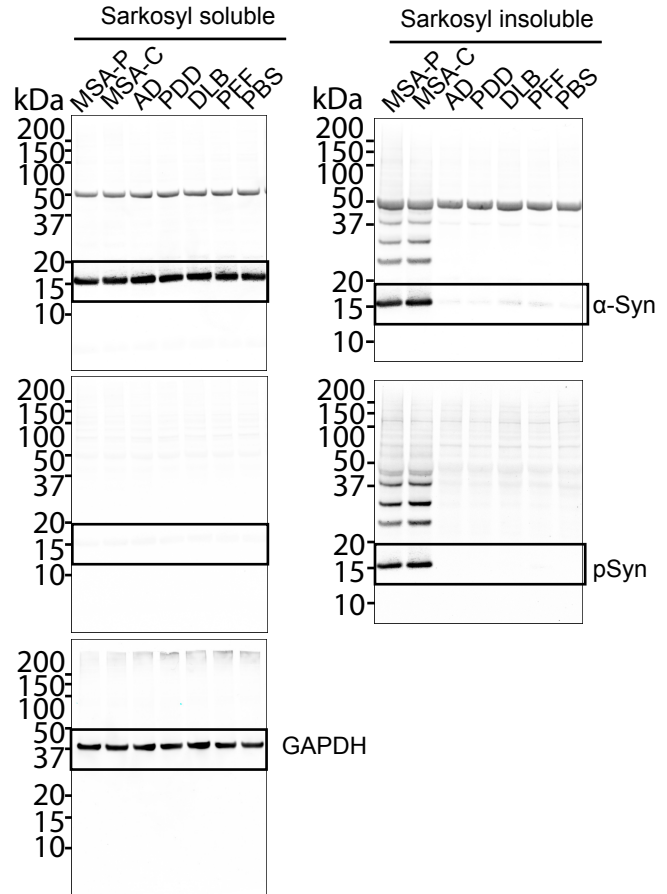

Extended data fig. 4d

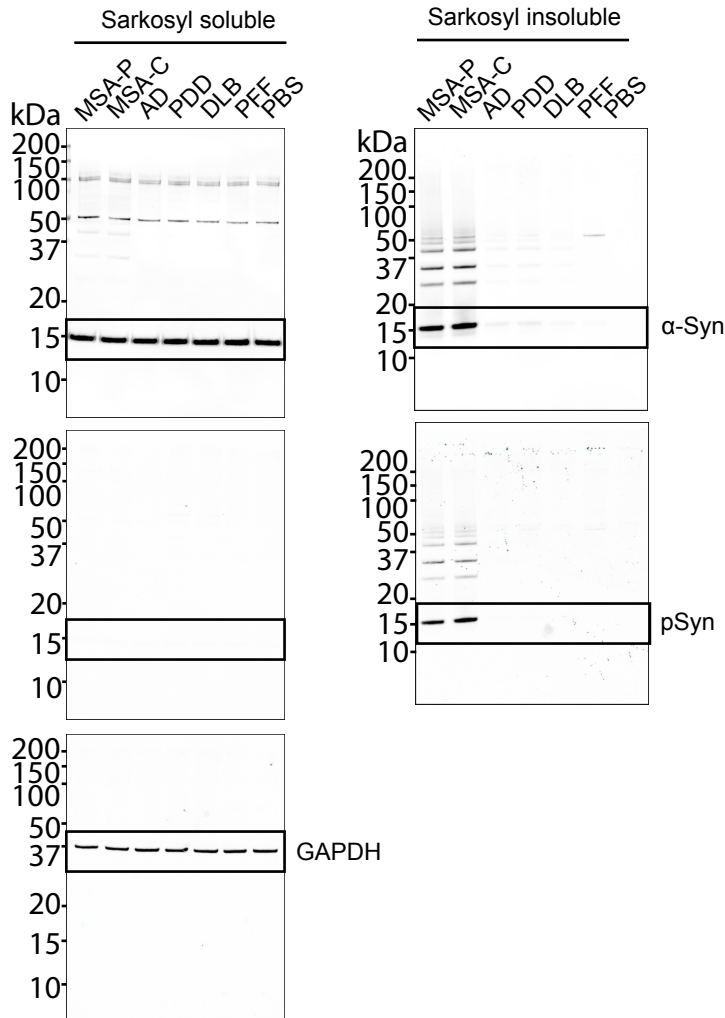

Extended data fig. 6b

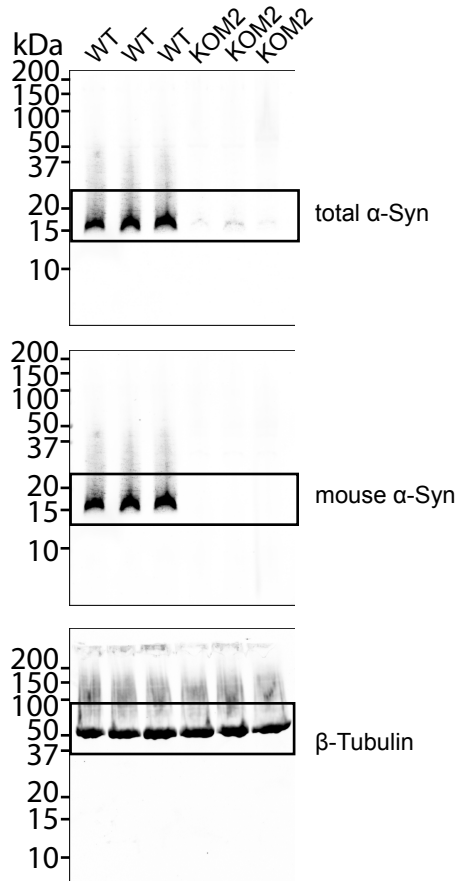

# Supplementary Fig. 1. Full blots of western blot data (continue)

Extended Data Fig. 10c

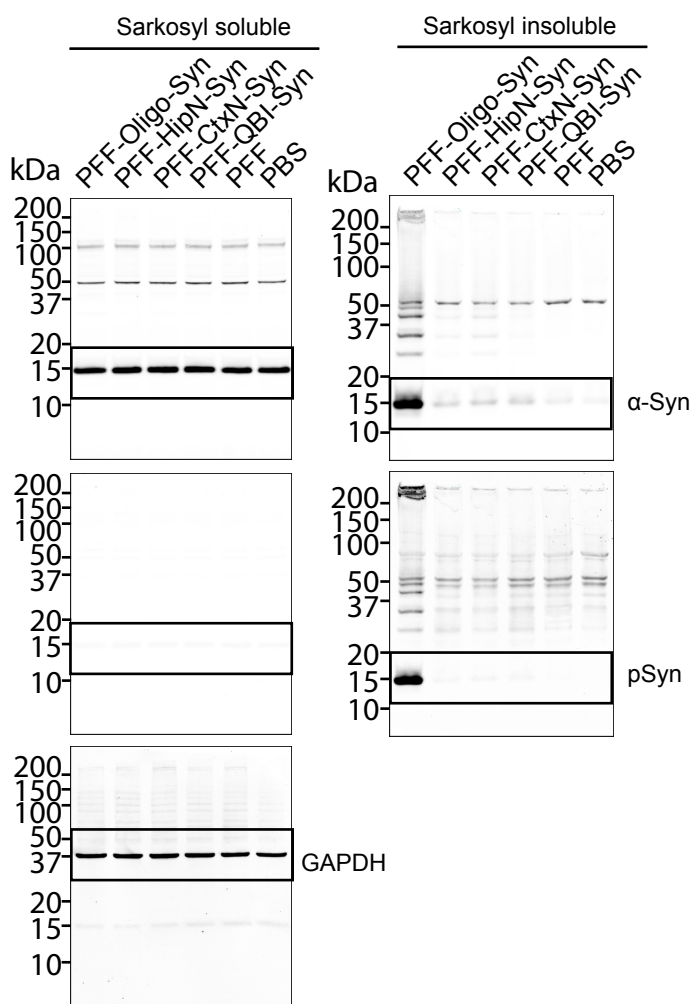

Extended Data Fig. 10f

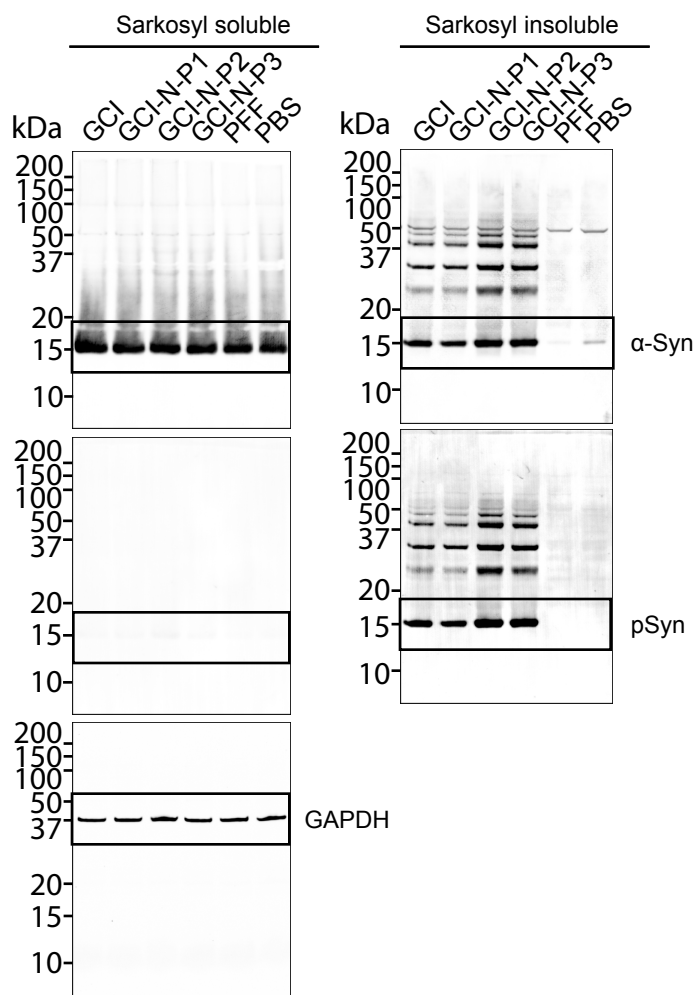

Supplement: NIHMS958028-supplement-1.pdf [file NIHMS958028-supplement-1.pdf]
